# Supplementary figures and images for: An Evaluation of a SARS-CoV-2 Pseudovirus Neutralization Test and A Comparison to a SARS-CoV-2 Surrogate Virus Neutralization Test in a COVID-19 Long-Term Follow-Up Cohort
Source: MDPI journal article supplement (doi:10.3390/microbiolres15010028), 2024-03-21

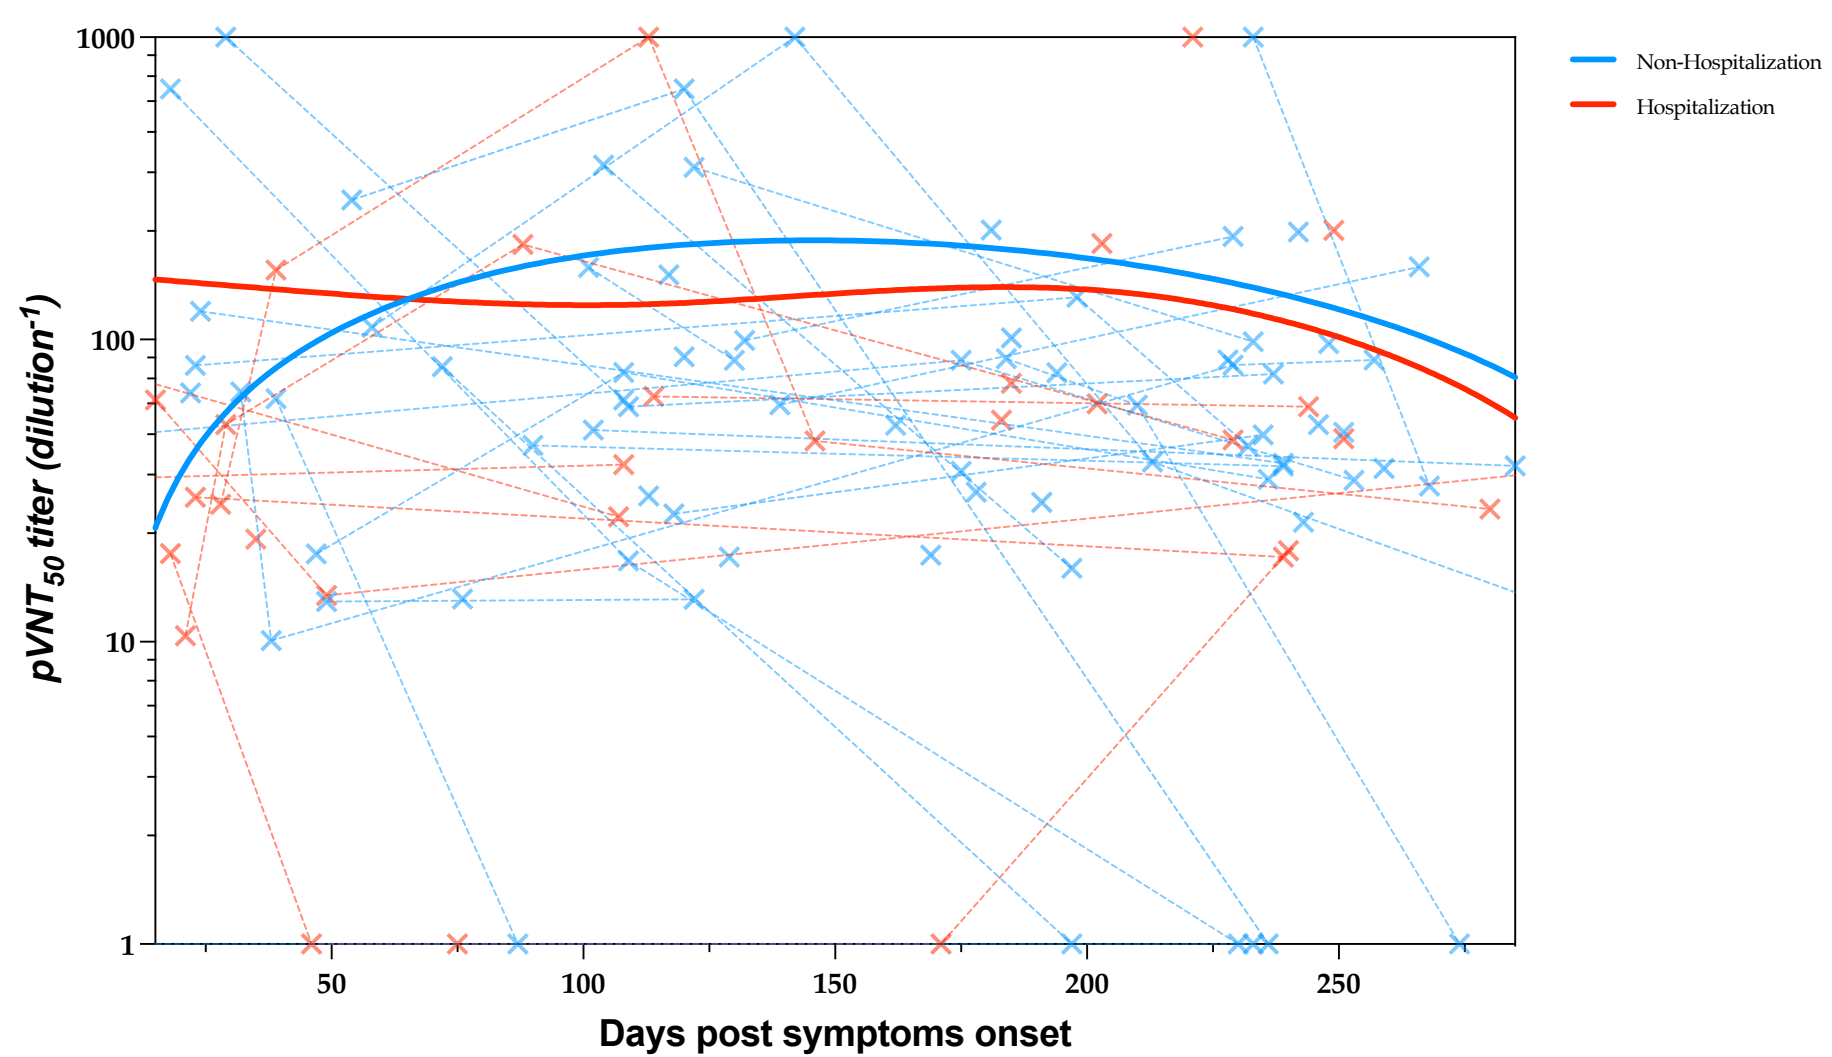

Supplement: s1 [file s1]
